# Supplementary material
Source: Springer Nature journal article supplement (https://www.springermedizin.de/resource/supplementary/13075_2010_9757_MOESM4_ESM.pdf/9693570)

**(A)**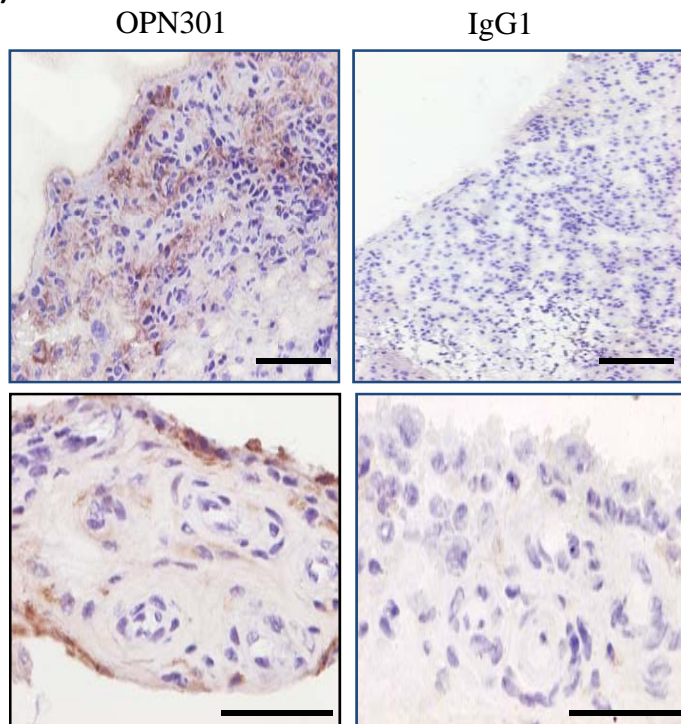**(B)**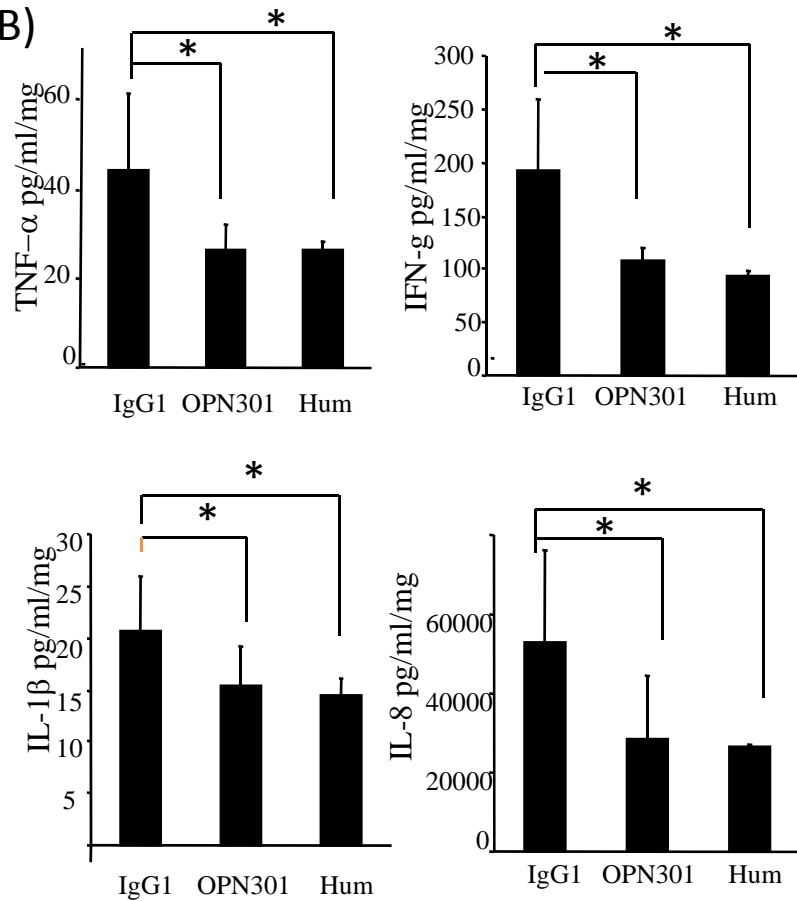

Supplement: MOESM4 [file 9693570]
